# Supplementary material for: An efficient and economical degradation strategy for epoxy thermosets based on a low-cost transesterification catalyst
Source: Royal Society of Chemistry journal article supplement (doi:10.1039/d4py01137f), 2024-01-01
Supplement: d4py01137f1.pdf [file d4py01137f1.pdf]

## Supplementary information

### **An efficient and economical degradation strategy for epoxy thermoset based on low cost transesterification catalyst**

*Zhijun Yang,<sup>a</sup> Shuhan Zhang<sup>a</sup>, Huan Liang<sup>a</sup>, Enjian He<sup>a</sup>, Yixuan Wang<sup>a</sup>, Ting Lei<sup>b</sup>, Zhicheng Wu<sup>c</sup>, Qiulin Chen<sup>d</sup>, Fusheng Zhou<sup>d</sup>, Yen Wei,<sup>\*a</sup> and Yan Ji<sup>\*a</sup>*

---

<sup>a</sup>*The Key Laboratory of Bioorganic Phosphorus Chemistry & Chemical Biology (Ministry of Education), Department of Chemistry, Tsinghua University, Beijing 100084, China.*

<sup>b</sup>*Department of Electrical Engineering, Tsinghua University, Beijing 100084, China.*

<sup>c</sup>*State Key Laboratory of Electrical Insulation and Power Equipment, Xi'an Jiaotong University, Xi'an 710049, China.*

<sup>d</sup>*Electric Power Research Institute, China Southern Power Grid Co. Ltd, Guangzhou 510623, China.*

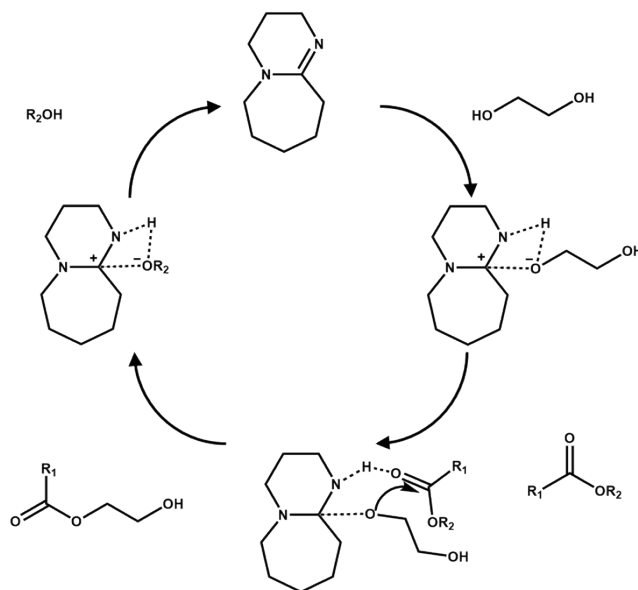

**Figure S1.** The proposed catalytic mechanism of alcoholysis reaction between ester and alcohol using DBU catalyst.

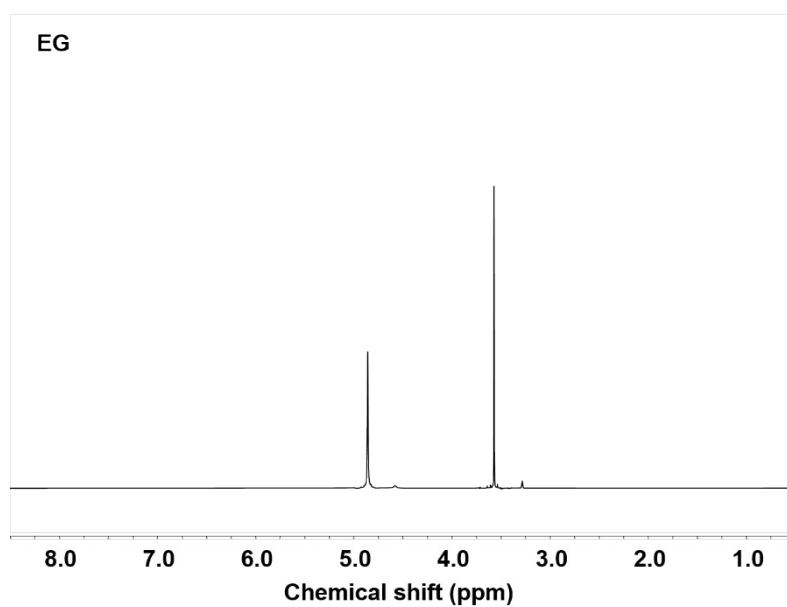

**Figure S2.**  $^1H$  NMR spectrum of ethylene glycol (EG).  $^1H$  NMR (400 MHz, Methanol- $d_4$ )  $\delta$  4.58 (s, 4H), 3.57 (s, 3H).

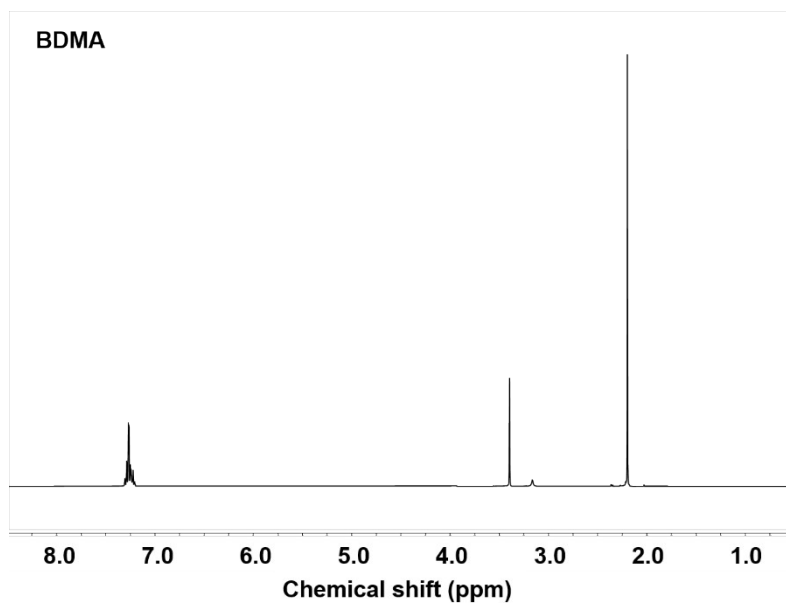

**Figure S3.** <sup>1</sup>H NMR spectrum of BDMA. <sup>1</sup>H NMR (400 MHz, Chloroform-*d*)  $\delta$  7.33 – 7.18 (m, 3H), 3.40 (s, 1H), 2.20 (s, 3H).

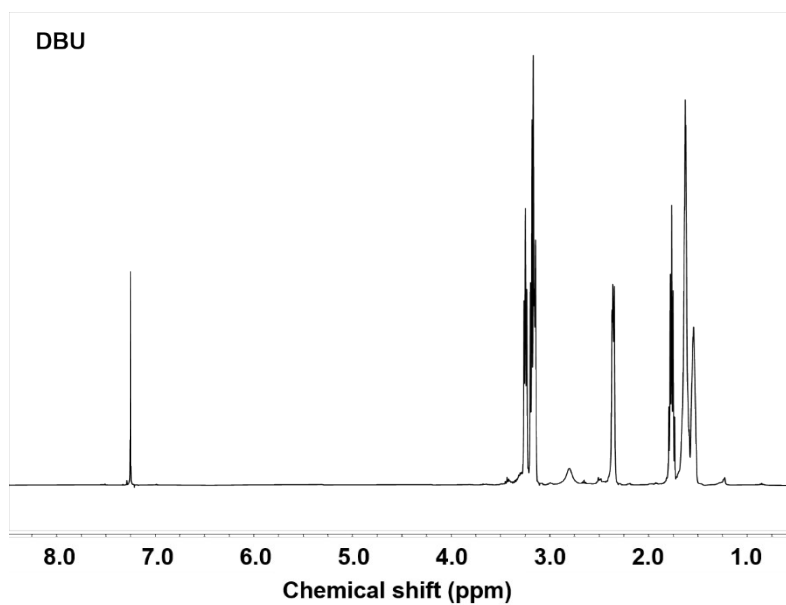

**Figure S4.** <sup>1</sup>H NMR spectrum of DBU. <sup>1</sup>H NMR (400 MHz, Chloroform-*d*)  $\delta$  3.25 (t,  $J = 5.6$  Hz, 1H), 3.17 (dt,  $J = 9.0, 5.2$  Hz, 2H), 2.39 – 2.32 (m, 1H), 1.77 (p,  $J = 6.0$  Hz, 1H), 1.64 (dd,  $J = 7.3, 5.2$  Hz, 1H), 1.54 (q,  $J = 5.0, 3.7$  Hz, 1H).
